# Supplementary material for: SARS-CoV-2 Inhibitors Identified by Phenotypic Analysis of a Collection of Viral RNA-Binding Molecules
Source: Pharmaceuticals (Basel). 2022 Nov 22;15(12):1448. doi: 10.3390/ph15121448 (PMC9784969; doi:10.3390/ph15121448)
Supplement: Supplementary file 1 [file pharmaceuticals-15-01448-s001.zip › pharmaceuticals-1998476-table S1.xlsx]

## Sheet: Hoja1
Compound identifier	SARS-CoV-2 EC50 (µM)		SARS-CoV-2 CC50 (µM)		SARS-CoV-2 SI		Previous target virus	Previous target virus activity	Previous target RNA	Previous target RNA binding	Reference	SMILES	CAS	Source
	Vero E6	293T	Vero E6	293T	Vero E6	293T
FDA-approved, HIV-1 Rev screen
Clomiphene citrate	0.449	0.371	2.62	>20	5.83519	>53.9	HIV-1	yes	RRE	yes	1	CCN(CC)CCOC1=CC=C(C=C1)C(=C(C2=CC=CC=C2)Cl)C3=CC=CC=C3.C(C(=O)O)C(CC(=O)O)(C(=O)O)O	50-41-9	Sigma Aldrich
Homochlorcyclizine	3.59	0.62	>20	n/d	>5.57	n/d	HIV-1	n/d	RRE	yes	1	C1CNCCN(C1)C(C2=CC=CC=C2)C3=CC=C(C=C3)Cl	24342-60-7	Prestwick chemical
Mitoxantrone	2.40	n/d	0.806	n/d	0.335833	n/d	HIV-1	yes	RRE	yes	1	C1=CC(=C2C(=C1NCCNCCO)C(=O)C3=C(C=CC(=C3C2=O)O)O)NCCNCCO	65271-80-9	Santa Cruz Biotechnology
Cyprohetadine	>20	n/d	>20	n/d	n/d	n/d	HIV-1	yes	RRE	yes	1	CN1CCC(=C2C3=CC=CC=C3C=CC4=CC=CC=C42)CC1	129-03-3	Santa Cruz Biotechnology
Cyprofloxacine	>20	n/d	>20	n/d	n/d	n/d	HIV-1	yes	RRE	yes	1	C1CC1N2C=C(C(=O)C3=CC(=C(C=C32)N4CCNCC4)F)C(=O)O	85721-33-1	Sigma Aldrich
drug-like, HIV-1 Rev screen
1b	2.05	n/d	3.03	n/d	1.47805	n/d	HIV-1	yes	RRE	yes	2	C1CC(OC1)CNCC(CN2C3=C(C=C(C=C3)Br)C4=C2C=CC(=C4)Br)O	325695-37-2	AKos GmbH
2b	>1.85	>10	>20	>20	n/d	n/d	HIV-1	yes	RRE	yes	2	C1CCC(CC1)N2C3=C(C=C(C2=N)S(=O)(=O)C4=CC=C(C=C4)Cl)C(=O)N5C=CC=CC5=N3	606953-74-6	AKos GmbH
1a	>20	n/d	1.11	n/d	<0.06	n/d	HIV-1	yes	RRE	yes	2	CN(C)CCOC1=CC2=C(C3=CC=CC=C31)C4=CC=CC=C4C2=O	78250-23-4	MyriaScreen Diversity Collection
17a5	>20	n/d	>20	n/d	n/a	n/d	HIV-1	yes	RRE	yes	2	CC(=C)CN1C2=C(N=C1NCCCN3C=CN=C3)N(C(=O)NC2=O)C	476482-25-4	MyriaScreen Diversity Collection
2a	6.24	0.63	>20	5.32	>3.21	8.44444	HIV-1	yes	RRE	yes	2	C1CN(CCN1)C2=NC(=C(C(=C2F)SC3=CC=C(C=C3)Cl)F)F	445471-41-0	Sigma-Aldrich
1d	6.24	0.52	6.86	7.50	1.09936	14.4231	HIV-1	yes	RRE	yes	2	CCN(CC)CCNC1=CC(=NC2=CC=CC=C21)C3=CC=CS3	633299-20-4	MyriaScreen Diversity Collection
clomiphene analogues, HIV-1
Trans-clomiphene	0.76	0.21	5.58	47.1	7.34211	224.286	HIV-1	yes	RRE	yes	Unpublished	CCN(CC)CCOC1=CC=C(C=C1)/C(=C(\C2=CC=CC=C2)/Cl)/C3=CC=CC=C3	15690-57-0	Toronto Research Chemicals
Cis-clomiphene	0.59	0.52	6.86	6.87	11.6271	13.2115	HIV-1	yes	RRE	yes	Unpublished	CCN(CC)CCOC1=CC=C(C=C1)/C(=C(/C2=CC=CC=C2)\Cl)/C3=CC=CC=C3	15690-55-8	Toronto Research Chemicals
4'OH-tamoxifen	0.74	n/d	2.70	n/d	3.64865	n/d	HIV-1	yes	RRE	yes	Unpublished	CCC(=C(C1=CC=CC=C1)C2=CC=C(C=C2)OCCN(C)C)C3=CC=C(C=C3)O	851342-34-2	Toronto Research Chemicals
βOH-tamoxifen	5.40	n/d	22.2	n/d	4.11111	n/d	HIV-1	yes	RRE	yes	Unpublished	CN(C)CCOC1=CC=C(C=C1)C(=C(CCO)C2=CC=CC=C2)C3=CC=CC=C3	1262682-37-0	Toronto Research Chemicals
Tamoxifen dimer	>20	n/d	>20	n/d	n/d	n/d	HIV-1	no	RRE	yes	Unpublished	CCC(=C(C1=CC=CC=C1)C2=CC=C(C=C2)OCCN(C)CCOC3=CC=C(C=C3)C(=C(CC)C4=CC=CC=C4)C5=CC=CC=C5)C6=CC=CC=C6	1346606-51-6	Toronto Research Chemicals
drug-like, HIV-1 pharmacophore screen
trim	3.5	0.33	>89.8	23.5	>25.7	71.2121	HIV-1	yes	RRE	yes	3	C1=CC=C(C=C1)C(C2=CC=CC=C2)(C3=CC=CC=C3)N4C=C(N=C4)CCCN	195053-89-5	BOC Sciences
Trityl-piperazine	0.644	0.27	2.22	>3.67	3.4472	>13.6	HIV-1	yes	RRE	yes	3	CC1CN(CCN1)C(C2=CC=CC=C2)(C3=CC=CC=C3)C4=CC=CC=C4	326594-27-8	BOC Sciences
Bisphenylindol	2.10	n/d	5.58	n/d	2.65714	n/d	HIV-1	yes	RRE	yes	3	CCC(=C(C1=CC=C(C=C1)OC)C2=CC=C(C=C2)OC)C3=CN(C4=CC=CC=C43)CC(CN(C)C)O	444793-02-6	Princeton BioMolecular Research
Triparanol	0.811	n/d	>20	n/d	>24.7	n/d	HIV-1	yes	RRE	yes	3	CCN(CC)CCOC1=CC=C(C=C1)C(CC2=CC=C(C=C2)Cl)(C3=CC=C(C=C3)C)O	78-41-1	BOC Sciences
Rev mimic, HIV-1
18	>20	n/d	>20	n/d	n/d	n/d	HIV-1	yes	RRE	yes	5	CC1=CC(=CC(C)=C1C1=CC(CCCNC(N)=N)=CC(CCCNC(N)=N)=C1)C1=C(CCNC(N)=N)C=CC=C1CCNC(N)=N		Synthetic
11	>20	n/d	>20	n/d	n/d	n/d	HIV-1	yes	RRE	yes	5	CC1=CC(=CC(C)=C1C1=CC(CCCN)=C(O)C(CCCN)=C1)C1=C(CCN)C=CC=C1CCN		Synthetic
1b	>20	n/d	>20	n/d	n/d	n/d	HIV-1	no	RRE	yes	4	CCC1=CC(=C(CC)C=C1C1=C(CCN)C=C(OC)C(CCN)=C1)C1=CC(CCN)=C(OC)C=C1CCN		Synthetic
1	>20	n/d	>20	n/d	n/d	n/d	HIV-1	n/d	RRE	yes	5	COC1=CC=C(C(CCN)=C1)C1=CC=C(C(C)=C1)C1=CC=C(O)C(CCN)=C1		Synthetic
6	>20	n/d	>20	n/d	n/d	n/d	HIV-1	yes	RRE	yes	5	CC1=CC(=CC(C)=C1C1=CC(CCN)=C(OC2=CC=CC=C2)C(CCN)=C1)C1=C(CCN)C=CC=C1CCN		Synthetic
1a	>20	n/d	>20	n/d	n/d	n/d	HIV-1	yes	RRE	yes	4	COC1=CC(CCN)=C(C=C1CCN)C1=CC(C)=C(C=C1C)C1=CC(CCN)=C(OC)C=C1CCN		Synthetic
3a	>20	n/d	>20	n/d	n/d	n/d	HIV-1	yes	RRE	yes	4	COC1=CC(CCN)=C(C=C1CCN)C1=CC(C)=C(C=C1C)C1=CC(CCN)=C(OC)C=C1		Synthetic
2b	>20	n/d	>20	n/d	n/d	n/d	HIV-1	no	RRE	yes	4	CCC1=CC(=C(CC)C=C1C1=C(CCCN)C=C(OC)C(CCCN)=C1)C1=CC(CCCN)=C(OC)C=C1CCCN		Synthetic
4	>20	n/d	>20	n/d	n/d	n/d	HIV-1	yes	RRE	yes	4	CC1=CC(=C(C)C=C1C1=C(CCN)C=CC(CCN)=C1)C1=CC=CC=C1CCN		Synthetic
drug-like, HCV pharmacophore screen
qz2	7.52	0.12	>20	> 6.6	>2.66	> 55	HCV	n/d	IRES	yes	6	CC(C)CCN1CCC(CC1)CNC2=NC3=CC=CC=C3C(=O)N2	2094824-90-3	SIA Enamine
qn1	9.40	0.32	>20	n/d	>2.1	n/d	HCV	n/d	IRES	yes	6	CCN(CC)CCCC(C)NC1=NC2=CC=CC=C2C=C1	790998-50-4	SIA Enamine
gn1	>20	n/d	n/d	n/d	n/d	n/d	HCV	n/d	IRES	yes	6	CC(CNC1=NC2=C(C=NN2C3=CC=CC=C3)C(=O)N1)CN4C=CN=C4	1384627-35-3	SIA Enamine
Reference SARS-CoV-2 antiviral
Remdesivir	0.428	0.0104	>20	>2	>46.7	>192						CCC(CC)COC(=O)C(C)NP(=O)(OCC1C(C(C(O1)(C#N)C2=CC=C3N2N=CN=C3N)O)O)OC4=CC=CC=C4	1809249-37-3	Medkoo
References
1. Prado, S. et al. Bioavailable inhibitors of HIV-1 RNA biogenesis identified through a Rev-based screen. Biochem Pharmacol 107, 14-28 (2016)
2. Prado, S. et al. A small-molecule inhibitor of HIV-1 Rev function detected by a diversity screen based on RRE-Rev interference. Biochemical Pharmacology 156, 68-77 (2018)
3. Simba-Lahuasi, A., Bedoya, L.M., Alcami, J. & Gallego, J. Unpublished results.
4. Medina-Trillo, C. et al. Nucleic acid recognition and antiviral activity of 1,4-substituted terphenyl compounds mimicking all faces of the HIV-1 Rev protein positively-charged alpha-helix. Scientific Reports 10, 7190 (2020).
5. Sedgwick, D.M. Synthesis of novel fluorinated building blocks and α-helix peptidomimetics. Ph.D. thesis. University of Valencia (2018)
6. Martín-Villamil, M., Sanmartín, I., Moreno, A. & Gallego, J. Pharmacophore-based discovery of viral RNA conformational modulators. Pharmaceuticals 15, 748 (2022)
n/d: not determined
